# Supplementary material for: Investigation of the Dengue Arbovirus in the Cities of Bushehr Province through Human Blood Sampling
Source: Research Square preprint supplement (doi:10.21203/rs.3.rs-5823814/v1), 2025-01-28
Supplement: Supplementary file 1 [file bdcb804a7eba91509a8402f3.docx]

**Highlights**

- This study investigates the prevalence of the dengue arbovirus in Bushehr Province, Iran, using ELISA testing on human blood samples.
- Five positive cases were detected among 180 samples, indicating a 2.78% prevalence rate of dengue virus antibodies in the region.
- Results reveal active circulation of dengue virus in several cities, emphasizing the importance of targeted surveillance and vector control measures.
- The study provides critical insights into the public health risks posed by dengue in coastal regions with favorable climatic conditions for Aedes mosquito proliferation.
- Findings support the implementation of proactive public health strategies, including community awareness, improved healthcare infrastructure, and integrated vector management programs.
